# Supplementary material
Source: PubMed Central journal article supplement (PMC4506857)
Supplement: NIHMS694147-supplement-1.pdf [file NIHMS694147-supplement-1.pdf]

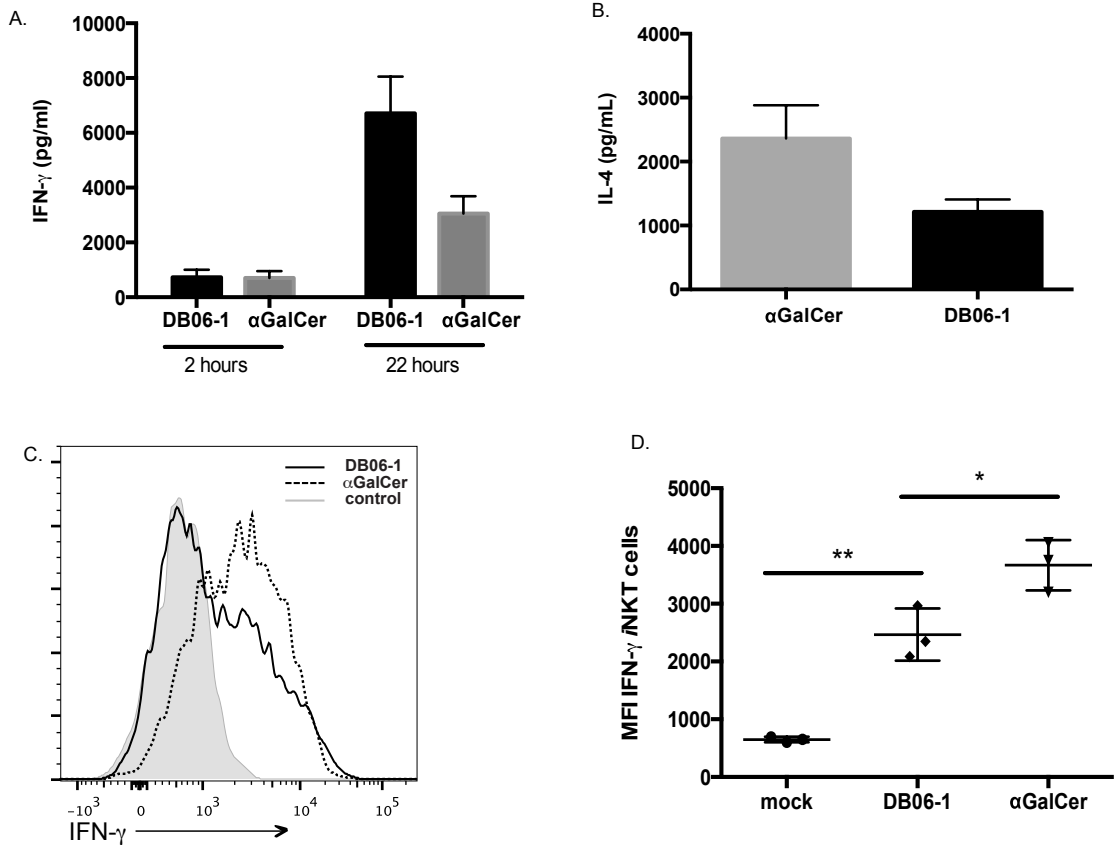

**Supplemental Figure 1. *In vivo* cytokine responses of C57Bl/6 mice to GSL Ags. (A)**

IFN- $\gamma$  in the sera of mice injected with  $\alpha$ GalCer or DB06-1 2 or 22 h earlier. Cytokine was measured by sandwich ELISA. 3 mice per group, error bars represent  $\pm$  SEM. (B) IL-4 in sera at 2 h post injection. Cytokine was measured by sandwich ELISA. 3 mice per group, error bars represent  $\pm$  SEM. (C) ICCS to measure IFN- $\gamma$  production by splenic *i*NKT cells, gated as live cells, B220<sup>-</sup>, CD8 $\alpha$ <sup>-</sup>, CD3 $\epsilon$ <sup>+</sup> and CD1d-tet<sup>+</sup>. (D) Summary graph of MFI IFN- $\gamma$  of *i*NKT cells 2 h post injection. 3 mice per group. Error bars represent  $\pm$  SEM.

A.

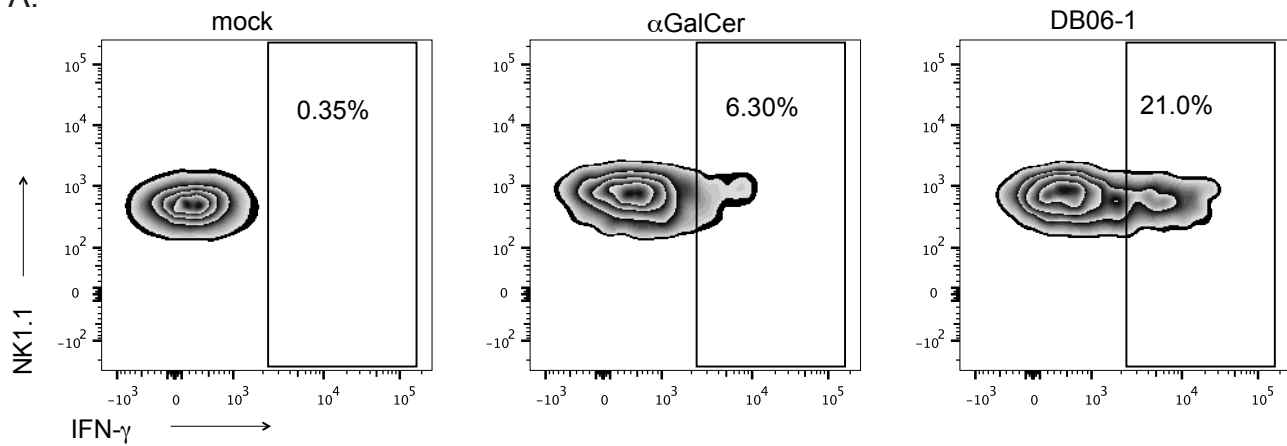

B.

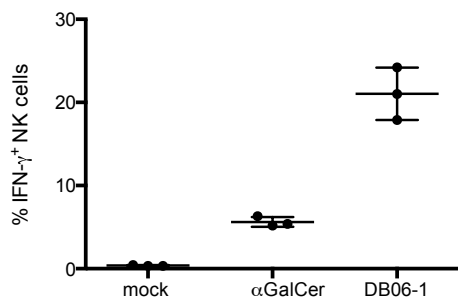

C.

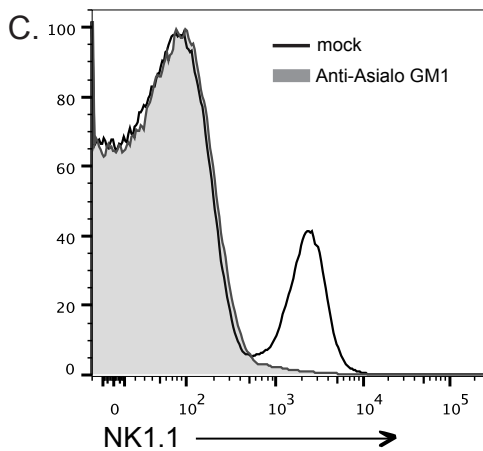

D.

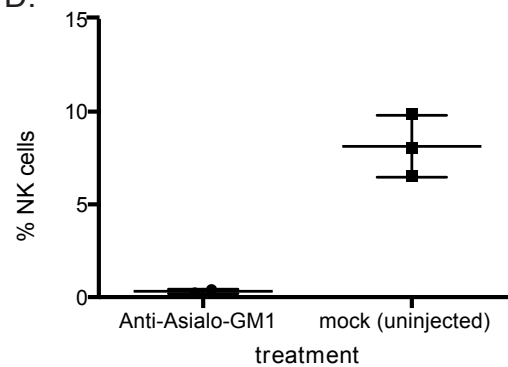

E.

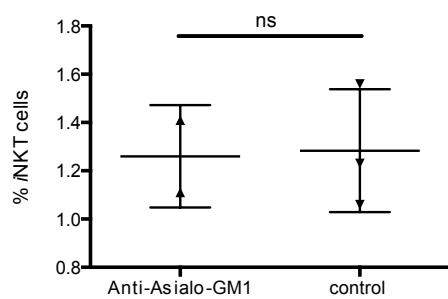

F.

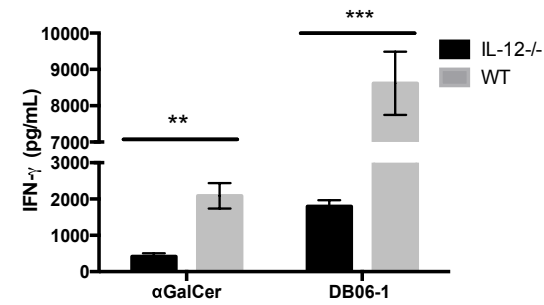

G.

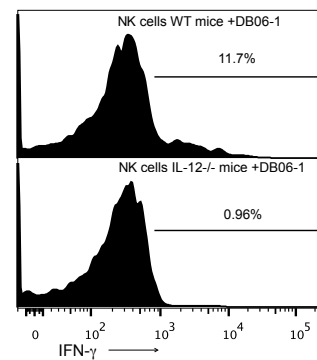

**Supplemental Figure 2. In vivo NK cell responses to glycolipid Ags. (A)**

Representative flow cytometry plots for intracellular IFN- $\gamma$  showing splenic NK cells, gated as live cells that are B220<sup>-</sup>, CD3 $\epsilon$ <sup>-</sup>, and NK1.1<sup>+</sup>. Data were obtained from mice injected with no GSL (mock),  $\alpha$ GalCer or DB06-1 and analyzed at 24 h post injection.

(B) Representative data of one of three experiments showing % IFN- $\gamma$ <sup>+</sup> NK cells at 24 h post injection with 3 mice per group. (C) Staining of splenic NK cells in control mice and mice treated with anti-Asialo-GM1 antibody showing the effectiveness of NK cell depletion. NK cells were gated as live cells that were B220<sup>-</sup>, CD3 $\epsilon$ <sup>-</sup> and NK1.1<sup>+</sup>. Un-injected mice (mock) were compared to anti-asialo-GM1 treated mice. (D)

Representative data from one of two experiments depicting the percent NK cell depletion with anti-asialo-GM1 treatment. (E) Percent *i*NKT cells after anti-asialo-GM1 Ab treatment, showing that *i*NKT cells were not affected. (F) IFN- $\gamma$  in sera comparing WT and IL-12<sup>-/-</sup> mice 24 h post injection. Combined data from 2 different experiments, 5 mice per group. (G) ICCS IFN- $\gamma$  from splenic NK cells 24 h post injection comparing WT and IL-12<sup>-/-</sup> mice. Representative data from one of two experiments.

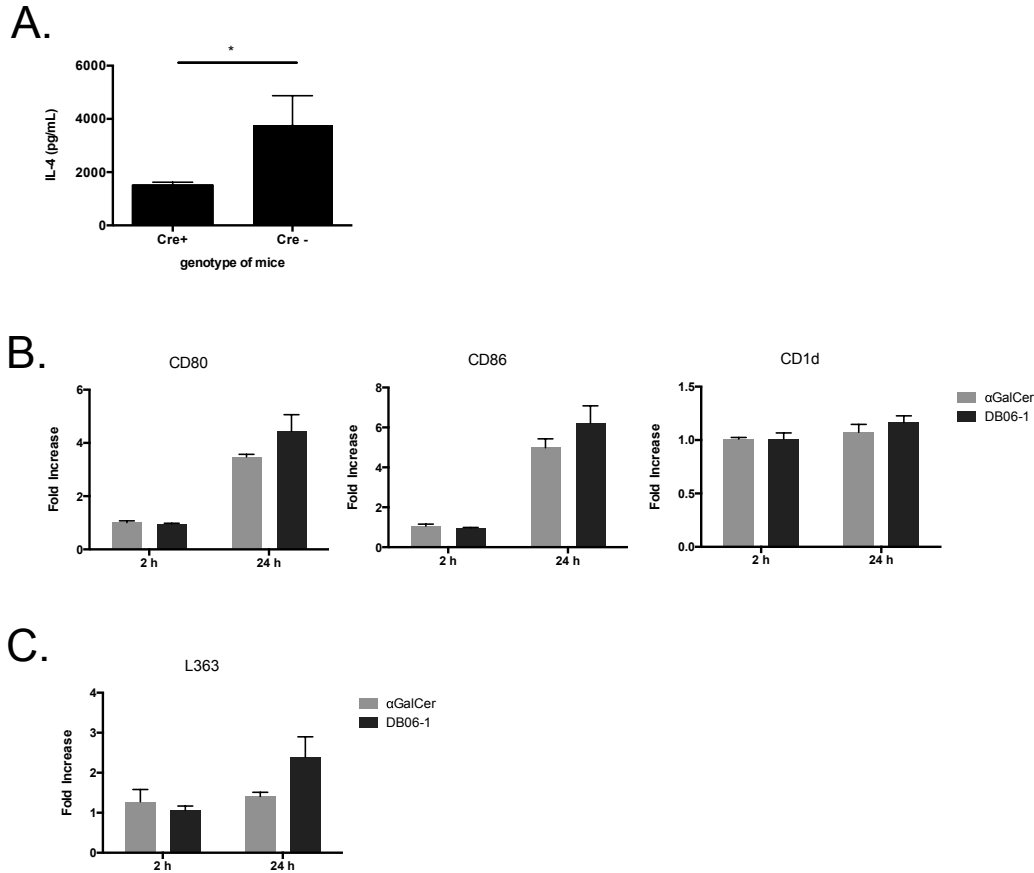

**Supplemental Figure 3. DC responses in GSL injected mice.** (A) IL-4 in sera at 2 h after injection of DB06-1 measured by sandwich ELISA comparing *Cd11c-Cre* mice ( $Cre^+$ ) to *Cd11c-Cre* controls lacking the Cre transgene ( $Cre^-$ ). (B,C) Splenic  $CD8\alpha^+$  DCs ( $CD11c^+ CD8\alpha^+$ ) were analyzed by flow cytometry for the indicated cell surface molecules at 2 and 24 h following i.v. injection of 1  $\mu$ g of either DB06-1 or  $\alpha$ GalCer (gray,  $\alpha$ GalCer; black, DB06-1). Changes in cell surface expression molecules are shown as the fold increase compared to uninjected control mice. CD1d and activation markers CD80 and CD86 are shown in (B) and GSL-CD1d complex formation as measured by L363 is shown in (C). Data shown are representative of one of two experiments showing means  $\pm$  SD for triplicate mice in each group.

**Supplemental Table I.** Data collection and refinement statistics from CD1d-DB06-1-TCR mouse ternary crystal structure (PDB ID 4ZAK).

| <b>Data collection statistics</b>  | <b>CD1d-DB06-1-TCR</b> |
|------------------------------------|------------------------|
| Space group                        | C222 <sub>1</sub>      |
| Cell dimension                     |                        |
| <i>a, b, c</i> , (Å)               | 78.9, 190.5, 150.8     |
| <i>α, β, γ</i> , (°)               | 90.0, 90.0, 90.0       |
| Resolution range (Å) [outer shell] | 50-2.83 (2.93-2.83)    |
| No. reflections                    | 27210 (2706)           |
| R <sub>merge</sub> (%)             | 12.2 (57.3)            |
| R <sub>pim</sub> (%)               | 6.1 (28.2)             |
| Multiplicity                       | 3.9 (3.8)              |
| Average I/σI                       | 10.4 (1.9)             |
| Completeness (%)                   | 98.1 (98.6)            |
| <b>Refinement statistics</b>       |                        |
| No. atoms                          | 6,341                  |
| Protein                            | 6,225                  |
| Ligand                             | 60                     |
| Carbohydrate                       | 56                     |
| R/R <sub>free</sub> (%)            | 21.6/25.6              |
| Ramachandran plot (%)              |                        |
| Favored                            | 97.7                   |
| Allowed                            | 100                    |
| R.m.s. deviations                  |                        |
| Bonds (Å)                          | 0.006                  |
| Angles (°)                         | 0.915                  |
| B-factors (Å <sup>2</sup> )        |                        |
| Protein                            | 50.2                   |
| Ligand                             | 40.4                   |
| Carbohydrate                       | 58.9                   |
